# Supplementary figures and images for: [18F]-FLT Positron Emission Tomography Can Be Used to Image the Response of Sensitive Tumors to PI3-Kinase Inhibition with the Novel Agent GDC-0941
Source: Oxford University Press journal article supplement (doi:10.1158/1535-7163.mct-12-0905), 2013-02-20

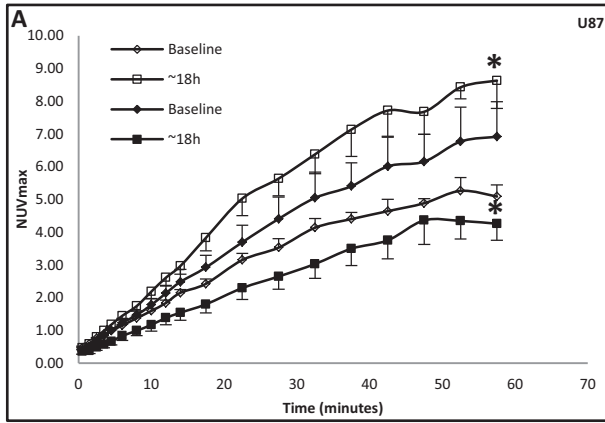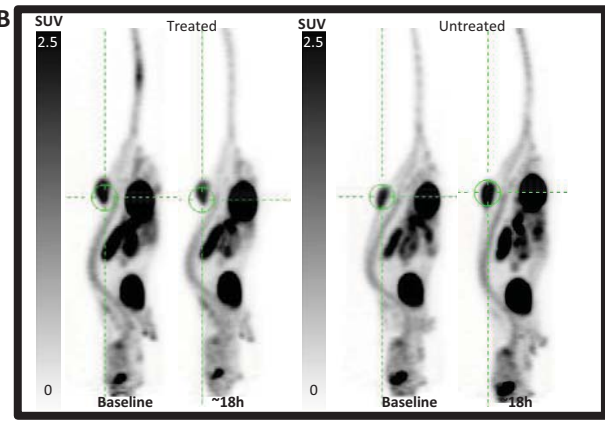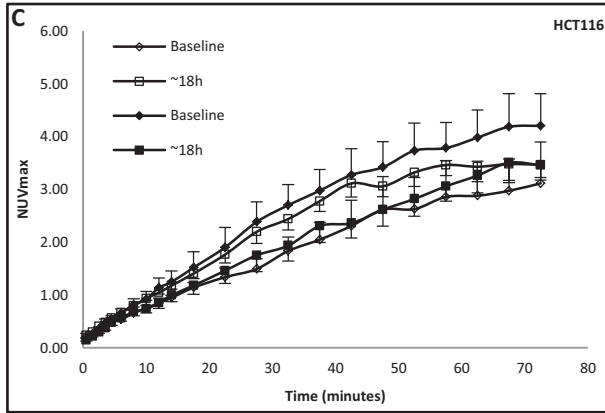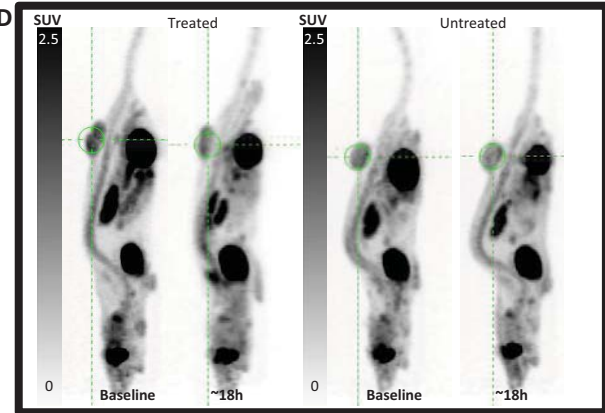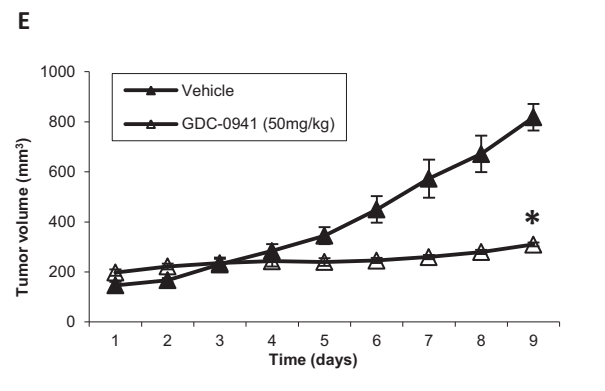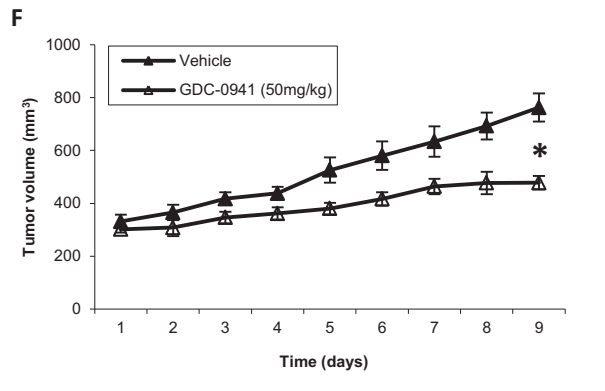

Supplementary Figure 3

Supplement: 15357163mct120905-sup-f3_pdf_75k.pdf [file 15357163mct120905-sup-f3_pdf_75k.pdf]
